1 **Population studies of the wild tomato species *Solanum chilense* reveal geographically**  
2 **structured major gene-mediated pathogen resistance**

3

4 **Running title:** presence and loss of resistance in natural populations

5

6 Parvinderdeep S. Kahlon<sup>1</sup>, Shallet Mindih Seta<sup>1</sup>, Gesche Zander<sup>1</sup>, Daniela Scheikl<sup>2</sup>, Ralph  
7 Hückelhoven<sup>1</sup>, Matthieu H. A. J. Joosten<sup>3</sup> and Remco Stam<sup>1\*</sup>

8

9 1 Chair of Phytopathology, TUM School of Life Sciences, Technical University of Munich,  
10 Emil-Ramann-Str. 2, 85354, Freising, Germany

11 2 Section of Population genetics, TUM School of Life Sciences, Technical University of  
12 Munich, Liesel-Beckmann Str. 2, 85354, Freising, Germany

13 3 Laboratory of Phytopathology, Wageningen University and Research, Droevendaalsesteeg 1,  
14 6708 PB Wageningen, The Netherlands

15

16 \*Author for correspondence

17 Remco Stam, Chair of Phytopathology, TUM School of Life Sciences, Technical University of

18 Munich, Emil-Ramann-Str. 2, 85354, Freising, Germany, Email: [remco.stam@tum.de](mailto:remco.stam@tum.de)

## 19 **Abstract**

20 Natural plant populations encounter strong pathogen pressure and defense-associated genes are  
21 known to be under different selection pressure dependent on the pressure by the pathogens. Here  
22 we use wild tomato *Solanum chilense* populations to investigate natural resistance against  
23 *Cladosporium fulvum*, a well-known pathogenic fungus of domesticated tomatoes. We show that  
24 populations of *S. chilense* differ in resistance against the pathogen. Next, we explored the  
25 underlying molecular processes in a species wide-context. Then, focusing on recognition of the  
26 two prominent avirulence factors secreted by *C. fulvum* (Avr4 and Avr9) in central and northern  
27 populations of *S. chilense* we observed high complexity in the cognate *homologues of*  
28 *Cladosporium resistance (Hcr9)* locus underlying the recognition of these effectors. Presence of  
29 canonical genomic regions coding for *Cf-4* and *Cf-9*, two major dominant resistance genes in the  
30 *Hcr9* locus recognizing Avr4 and Avr9, respectively, does not meet prediction from Avr  
31 response phenotypes. We find both genes in varying fractions of the plant populations and we  
32 show possible co-existence of two functionally active resistance genes, previously thought to be  
33 allelic. Additionally, we observed the complete local absence of recognition of additional Avr  
34 proteins of *C. fulvum*. In the southern populations we attribute this to changes in the coregulatory  
35 network. As a result of loss of pathogen pressure or adaptation to extreme climatic conditions.  
36 This may ultimately explain the observed pathogen susceptibility in the southern populations.  
37 This work puts major gene mediated disease resistance in an ecological context.

38

39

40 **Keywords:** *Solanum chilense*, *Cladosporium fulvum*, *receptor-like proteins (RLPs)*, *Cf-9*, tomato,  
41 resistance.

42

43 Funding: This work was funded through the German Science Foundation (DFG), SFB924

44

## 45 **Introduction**

46

47 How plants and their pathogens adapt to one another in their natural habitat is still poorly  
48 understood. Some studies highlight the local adaptations in context to plant-pathogen  
49 interactions: the wild flax-flax rust pathosystem is such an example, where more resistant wild  
50 flax harbored more virulent strains of the rust (Thrall *et al.*, 2002; Thrall & Burdon, 2003).  
51 Similar mechanisms of the co-occurrence of virulent strains of the powdery mildew  
52 *Podosphaera plantaginis* and more resistant plants of *Plantago lanceolata* have also been  
53 documented (Laine, 2005; Soubeyrand *et al.*, 2009). Furthermore, complex multi-host and multi-  
54 pathogen systems, with clear differences at a regional scale, have been observed in anther smut-  
55 fungi-infecting *Dianthus* hosts in the southern European Alps (Petit *et al.*, 2017). The molecular  
56 mechanisms that is thought to drive these interactions is a gene-for-gene interaction (Flor, 1971),  
57 where single gene encoded pathogen molecules, now referred to as effectors, are recognized by  
58 specific receptors present in resistant host plants, also known as major resistance genes. The need  
59 to recognize an invading pathogen and subsequently evade the recognition by the plant and  
60 pathogen, respectively, leads to a constant co-evolutionary arms race, often described as the Red  
61 Queen dynamics (Van Valen, 1973). These dynamics are thought to have led to the plethora of  
62 different defense related genes in plants as we know it today. Wild crop relatives have been used  
63 as a gene pool for isolating and introducing genetic resistance against many different fungal  
64 pathogens. Genetic diversity of natural populations against microbes have been explored by  
65 sequence analysis or by experimental biology often still as independent, though complementary,  
66 approaches (Salvaudon *et al.*, 2008), leading to a huge gap in our understanding of local

67 adaptations and their role in shaping the current diversity of such resistance genes in an  
68 ecological context.

69 Tomato leaf mold is caused by the non-obligate biotrophic fungus *Cladosporium fulvum* syn.  
70 *Passalora fulva*. At the time of infection, *C. fulvum* enters through stomata into the leaf and  
71 colonizes the apoplastic spaces (Stergiopoulos & de Wit, 2009). The fungus secretes various  
72 small proteins, also referred to as effectors or avirulence factors (Avrs) when being recognized  
73 by a resistant host, into the apoplast with the aim to manipulate the host for its successful  
74 colonization of the host tissue. The infection leads to severe yellowing and wilting of the leaves,  
75 which ultimately leads to a loss of photosynthetic capacity and thus a loss in yield or reduced  
76 reproducible fitness. *C. fulvum* is a globally occurring pathogen with a clear genetic diversity  
77 (Iida *et al.*, 2015). It is thought to originate in the Andean region, where it likely has co-evolved  
78 with one or several of wild tomato species that inhabit a mountain range from central Ecuador to  
79 northern Peru (de Wit *et al.*, 2012). During evolution, as a result of selection pressure imposed  
80 by virulent strains of *C. fulvum*, several of the wild tomato species have evolved resistance genes  
81 whose products mediate recognition of the Avrs secreted by *C. fulvum* (Joosten & de Wit, 1999).  
82 This recognition facilitates host resistance following the gene-for-gene model. Resistance is  
83 eventually achieved when Avr-activated defense leads to a hypersensitive response (HR), which  
84 includes programmed cell death (PCD). This localized PCD is associated with various additional  
85 defense responses such as a massive callose deposition, and prevents *C. fulvum* from obtaining  
86 nutrients from the host, thereby limiting further pathogen ingress and multiplication (Lazarovits  
87 & Higgins, 1976).

88 To date, 24 *C. fulvum* (*Cf*) resistance genes have been mapped (Kanwar *et al.*, 1980). Due to the  
89 complexity of the *Cf* genes and their loci, only a small number of *Cf* genes have been cloned and

90 verified for their functionality. *Cf* genes are highly repetitive in their leucine-rich repeat encoding  
91 parts and functional homologs are often accompanied by non-functional ones, with very little  
92 sequence variation between them (Kruijt 2005). *Cf-9* from *S. pimpinellifolium* encodes a cell  
93 surface receptor-like protein (RLP) and was the first *Cf* resistance gene to be cloned (Jones *et al.*,  
94 1994). The *Cf-9* gene product recognizes the Avr9 protein of *C. fulvum*, which is a highly stable,  
95 cysteine-knotted peptide of unknown function (Scholtens-Toma & de Wit 1988). The *Cf-9* gene  
96 belongs to the *Hcr9* (homologs of *C. fulvum* resistance gene *Cf-9*) gene cluster, which is located  
97 on chromosome 1. In addition to *Cf-9*, *Cf-4* is another well-studied *Cf* gene from the *Hcr9*  
98 cluster. The *Cf-4* gene product recognizes Avr4 of *C. fulvum*, which is a chitin-binding protein  
99 having eight cysteine residues (Joosten *et al.*, 1994; van den Burg *et al.*, 2004), and the *Cf-4* gene  
100 originated from *S. habrochaites* (Thomas *et al.*, 1997). Studies on MM-Cf9 which is an Avr9-  
101 recognising introgression line of the domesticated tomato, *S. lycopersicum* cv Money Maker,  
102 revealed presence of five *Cf-9* homologs, *Hcr9-9A* to *Hcr9-9E*, mapped at the short arm of  
103 chromosome 1, with *Hcr9-9C* being the functional *Cf-9* gene (Parniske *et al.*, 1997). Similarly,  
104 *Hcr9-4A* to *Hcr9-4E* is present in the Avr4-recognising MM-Cf4 and *Hcr9-4D* corresponds to  
105 *Cf-4* (Thomas *et al.*, 1997). *Cf-4* and *Cf-9* lie at the same locus on chromosome 1 and are  
106 assumed to be mutually exclusive or even allelic. Crossings between recombinant inbred lines  
107 carrying *Cf-4* and *Cf-9* resulted in extreme genetic instability in the offspring (Parniske *et al.*,  
108 1997, Thomas *et al.*, 1997).

109 Appreciating the important roles of these *Cf* genes and their assumed role in co-evolution  
110 between wild tomato and native *C. fulvum*, it is surprising that only a few studies have sought to  
111 investigate *Cf* gene diversity. An effectoromics approach was exploited by Mesarich *et al.*  
112 (2017), to identify plants carrying novel *Cf* genes to be potentially used in plant breeding

113 programs in the future. Studies have shown that in *S. pimpinellifolium* several putative homologs  
114 are present, but their function remains unknown (Caicedo *et al.*, 2004; Caicedo, 2008). Another  
115 study identified four variants of *Cf-9* (originally isolated from *S. pimpinellifolium*), from its close  
116 relative *S. habrochaites* and each one variant of *Cf-4* from *S. habrochaites*, *S. chilense*, *S.*  
117 *chmielewskii*, *S. neorickii* and *S. arcanum* (Kruijt *et al.* 2005). In spite of multiple single  
118 nucleotide polymorphisms (SNPs) being present in the isolated *Cf* gene variants, all of them  
119 showed the ability to induce an HR after recognition of Avr9 and Avr4, respectively, which led  
120 the authors to conclude that Avr4 and Avr9 recognition is conserved among wild tomato.  
121 However, a species-wide analysis of different accessions of *S. pimpinellifolium* revealed  
122 intragenic recombination to have occurred between *Hcr9-9D* and *Hcr9-9C/Cf-9*. The resulting  
123 allele, *9DC*, does not co-exist with the original *Cf-9* allele in the individual plants. Variant *9DC*  
124 is the more common allele in the species and the product also recognizes Avr9 (Van der Hoorn *et*  
125 *al.*, 2001), indicating that one likely cannot speak of conservation of *Cf* alleles *sensu stricto*. In  
126 addition, plants that recognize both Avr4 and Avr9 have not been identified. Detailed knowledge  
127 on the relationship between *Cf-4* and *Cf-9* in other accessions or wild populations of tomato, and  
128 on their actual roles in resistance is still lacking.

129 To perform more detailed studies on resistance provided by *Cf* genes in an ecological context, we  
130 selected *S. chilense*, one of seventeen wild tomato species, as it covers a wide variety of habitats  
131 on the western slopes of the Andes, ranging from Peru to Northern Chile (Nakazato *et al.*, 2010).  
132 The species range spreads from the edges of the Atacama Desert, as the southern edge of the  
133 range, to relatively wet, high altitude regions (up to 3500 meter above sea level), as well as in  
134 very specific coastal regions that experience regular sea fog (resulting in a relatively high  
135 humidity) in the most northern part of Chile, as well as in south Peru (Cereceda & Schemenauer

136 1991; Peralta *et al.*, 2008; Chetelat *et al.*, 2009). This highly varied distribution results in sub-  
137 populations of this species that encounter different environmental challenges. Ultimately, these  
138 different habitats lead to genetic differentiation within the species. The *S. chilense* population  
139 can be clustered in four groups: north, central, southern highlands and southern lowlands. The  
140 southern highlands and southern lowlands populations are derived from the central group  
141 (Böndele *et al.*, 2015). This divergence was confirmed by whole genome sequencing, and multiple  
142 sequential markovian coalescent simulations revealed that migrations happened from the central  
143 group southward 50,000 to 200,000 years ago (Stam *et al.*, 2019b). The strong differentiation  
144 between habitats leads to clearly observable adaptations. Southern populations respond faster to  
145 drought (Fischer *et al.*, 2013) whereas high altitude populations are more cold-tolerant (Nosenko  
146 *et al.*, 2016). In addition to adaptations to abiotic factors, these habitats are expected to be home  
147 to different biotic stressors at different intensity levels, including various pathogen species,  
148 which is anticipated to result in genetic variation in pathogen defense-associated genes. Indeed,  
149 differences in resistance properties of the various *S. chilense* populations against three pathogens,  
150 *Alternaria solani*, *Phytophthora infestans* and a *Fusarium* spp, are observed (Stam *et al.*, 2017).  
151 Moreover, large genetic variation has been observed within *S. chilense* populations in another  
152 resistance-associated gene family; the nucleotide-binding leucine-rich repeat (NLR) resistance  
153 genes. These genes show clear presence-absence-variation when compared to related tomato  
154 species (Stam *et al.*, 2019a), and an in-depth resequencing study, covering the whole species  
155 range of *S. chilense*, shows evidence that the selection pressure imposed on the individual NLRs  
156 differs for each of the populations (Stam *et al.*, 2019b).  
157 Little data exists showing biological interactions between *C. fulvum* and wild tomato species. In  
158 this study we investigated the interaction of the fungal pathogen *C. fulvum* with the wild tomato

159 species *S. chilense* throughout the geographical range of the species. We show that *S. chilense*  
160 plants from different locations first of all show differences in their resistance to the fungus,  
161 including complete loss of resistance in some populations. By investigating the well  
162 characterized genes of the *Hcr9* locus, we furthermore place major gene mediated immunity in  
163 an ecological context.

164

## 165 **Materials and methods:**

166

### 167 **Plants and fungal material**

168 Seeds of the fifteen accessions (populations) of *S. chilense* used in our studies were originally  
169 obtained from the C. M. Rick Tomato Genetics Resource Center of the University of California,  
170 Davis (TGRC UC-Davis) (<http://tgrc.ucdavis.edu/>). The selected accessions were LA1958,  
171 LA1963, LA2747, LA2931, LA2932, LA2750, LA2959, LA3111, LA3784, LA3786, LA4107,  
172 LA4117A, LA4118 and LA4330. Each Accession number represents a random collection of  
173 seeds from a wild population and is propagated by TGRC in a way to maintain maximum genetic  
174 diversity. Böndel et al (2015) have shown that this seed multiplication has negligible effect on  
175 the genetic diversity of the accessions. Hence, each accession can be considered to truly  
176 represent the diversity in the wild plant populations. Introgression lines *S. lycopersicum* cv  
177 Moneymaker (MM) of *Cf-9*, *Cf-4* and *Cf-5* were generated by Tigchelaar *et al.* (1984) and *S.*  
178 *pimpinellifolium* (LP12), in which the *9DC* was identified, and which was used as a control in all  
179 our assays were provided by TGRC UC-Davis. Per *S. chilense* accession 8-17 plants were  
180 grown. Plants were grown in a controlled glasshouse, with a minimum daytime temperature of  
181 24°C and 16 hours of light and 8 hours of dark conditions. Adult plants were cut back at bi-



182 weekly intervals to assure the presence of mature, fully developed, yet not senescent, leaves  
183 during each repetition of the experiment.

184 A race 5 strain of *C. fulvum* was maintained on 1/2 potato dextrose agar (PDA) medium and  
185 incubated at 16°C in the dark.

186

### 187 **Visualization of infection phenotype and quantification of *C. fulvum* biomass from tomato** 188 **leaves**

189 Spray inoculation of *C. fulvum* at a concentration 20,000 conidia/ml was performed on 3-week  
190 old plant cuttings of population LA3111, LA4330, MM-Cf-9 and MM-Cf-5 plants; water-  
191 inoculated plants served as a negative control in the experiment. Plants were maintained at 24°C  
192 and 16 hours of light and 8 hours of dark, with 100% humidity for the first two days, after which  
193 80% humidity was maintained throughout the experiment.

194 Photographs of leaflets of inoculated plants were collected at 14 days post inoculation (dpi) and  
195 Microscopy was performed from 7dpi to 19dpi on bleached leaves following staining in acetic  
196 acid (25%) 1:9 + ink (K $\square$ nigsblau, Pelikan, 4001) then washed in water and analysed under  
197 brightfield microscope (Zeiss, Imager Z1m).

198 For quantification, leaflets of inoculated plants were collected at 14 days post inoculation (dpi)  
199 and DNA was isolated using the protocol published by Yan *et al.* (2008). The infection loads or  
200 approximate amounts of *C. fulvum* DNA present in inoculated leaves were quantified by qPCR  
201 using the DNA-binding fluorophore Maxima SYBR Green Master Mix (2X) with ROX solution  
202 (Thermo Scientific). All qPCR reactions were performed on an AriaMx Real-Time PCR system  
203 (Agilent Technologies, Waldbronn, Germany). PCR were performed with the primer pairs  
204 RS158 (5'-GTCTCCGGCTGAGCAGTT-3')/ ITS4 (5'-TCCTCCGCTTATTGATATGC-3') and  
205 RS001 (5'-GCCTACCATGAGCAGCTTTC-3')/ RS002 (5'-CAATGCGTGAGAAGACCTCA-

206 3'), annealing to the ITS region and *elongation factor 1 alpha*, respectively, present in the *C.*  
207 *fulvum* DNA. Templates used for this experiment were genomic DNA isolated from the leaves  
208 inoculated with the pathogen and water. Amplifications using both primer pairs for each sample  
209 were done on the same plate and in the run. The experiment was performed on three plants of  
210 MM-Cf-9 and MM-Cf-5 each and five plants of LA3111 and LA4330 each. All the plants  
211 samples well evaluated in three technical replicates and Cq differences higher than one among  
212 technical replicates was not considered in the final evaluation. The Cq values and the linear  
213 equations from the sensitivity graphs were used to calculate the quantities of pathogen and plant  
214 DNA in each sample (Figure S1).

215

#### 216 **Apoplasmic washing fluid (AF), Avr9 and Avr4 infiltration assay**

217 AF containing the complete set of *C. fulvum* Avr's, except for Avr5, was obtained by isolating AF  
218 from leaves of MM-Cf-5 plants colonized by race 5 of *C. fulvum*, at 10 to 14 days after  
219 inoculation. Furthermore, a preparation of Avr9 concentrated from AF by acetone precipitation,  
220 leaving the Avr9 peptide in the supernatant, and Avr4 produced in the yeast *Pichia pastoris*,  
221 were employed.

222 Using a 1 ml syringe (Braun, Omnifix) without a needle, the AF, Avr9 and Avr4 preparations  
223 were infiltrated from the lower side of fully expanded leaves of the different populations.  
224 Experiments were performed in three independent biological replicates. Infiltrations were done  
225 in fully expanded leaves of the same adult plant, with two technical replicates per plant.  
226 Readings were performed between 2 to 7 days post infiltration. For Avr9 infiltration, an HR was  
227 typically observed within 1-4 days, whereas the AF- and Avr4-triggered HR were observed later.  
228 Readings were not performed later than 7 days after infiltration.

229

### 230 **Presence of *Cf-9*-, *9DC*-and *Cf-4*-specific regions in different *S. chilense* populations**

231 Screening of *S. chilense* populations for the presence of gene-specific regions of *Cf-9*, *9DC* and  
232 *Cf-4* was performed through PCR amplification using the gene-specific primers CS5-CS1 and  
233 DS1-CS1 for *Cf-9* and *9DC*, respectively (Van der Hoorn *et al.*, 2001). Primer pair PSK047 (5'-  
234 ACGACAGAAGAAGACTC-3')/ PSK050 (5'-GATGGAATTGGTCCTT-3'), was designed to  
235 amplify the canonical *Cf-4* domain (Fig. S2). DNA was isolated using standard CTAB  
236 extraction, using the same samples as used in a previous study (Stam *et al.*, 2016; Stam *et al.*,  
237 2019b). PCR on gDNA was performed using Promega Green GoTaq® Polymerase and the  
238 products were analyzed by 1% agarose gel electrophoresis. As a PCR control *elongation factor*  
239 *I alpha*, amplified with the primer pair 5'-GTCCCCATCTCTGGTTTTGA-3'/ 5'-  
240 GGGTCATCTTTGGAGTTGGA-3', was included and MM-Cf-9 and MM-Cf-4, and LP12  
241 served as positive and negative controls, respectively.

242

### 243 **Semi-quantitative evaluation of the expression of a *Cf-9* homolog in the southern** 244 **population LA4330**

245 We evaluated the transcript levels of the *Cf-9* homolog in LA4330 at eight hours after Avr9 or  
246 water infiltration. RNA from the infiltrated leaves was extracted using the RNeasy plant mini kit  
247 (Qiagen) and cDNA was synthesized using the QuantiTect reverse transcription kit (Qiagen).  
248 Amplification of *Cf-9* the canonical region of the *Cf-9* homolog was performed with primer pair  
249 binding on the start and end of the ORF, PSK009 (5'-ATGGATTGTGTAAACTTGTATTCCT  
250 -3') /PSK010 (5'-CTAATATCTTTTCTTGTGCTTTTTCA -3'), and the product was visualized  
251 on 1% agarose gel.

252

### 253 **Whole genome sequence analyses for *Cf* co-receptors in *S. chilense***

254 We extracted the sequences for four important components of the Cf protein signaling complex,  
255 for which we chose SUPPRESSOR OF BIR1 (SOBIR1), SOMATIC EMBRYOGENESIS  
256 RECEPTOR-KINASE 3A (SERK3a) and AVR9/CF-9-INDUCED KINASE 1 (ACIK1) (Wu,  
257 2020), as well as for an additional potential co-receptor of the BAK1 signaling complex, BIR2  
258 (Halter *et al.*, 2014) from NCBI. To identify the genomic sequences encoding these co-receptors  
259 and regulators of Cf proteins in *S. chilense*, we performed a BLAST search against the *S.*  
260 *chilense* reference genome (Stam *et al.*, 2019b). Each *SOBIR1*, *SEKR3a* and *ACIK1* yielded one  
261 unequivocal best target sequence in the reference genome and visual inspection after alignment  
262 confirmed that the *S. chilense* homologs are in all cases similar to the reference gene of *S.*  
263 *lycopersicum*. *BIR2* yielded two good hits, of which we dubbed the second one *BIR2b*.

264 In order to look for polymorphisms in three plants, one from LA3111, and one each from  
265 southern populations LA2932 and LA4330 (Stam, *et al.* 2019a), we obtained the genomic  
266 coordinates of the genes of interest from our reference genome and called the SNPs in the region  
267 of interest using samtools mpileup and bcftools call (-mv -Oz) (Li *et al.*, 2009; Li, 2011). We  
268 removed low quality indels and the resulting vcf files were tabulated using tabix, to allow the  
269 consensus sequences for the genomic regions to be extracted using bcftools consensus. Finally,  
270 we used gffread from gffutils (Pertea and Pertea 2020) to obtain the correct coding sequence for  
271 each of the plants. All multiple sequence alignments were made and inspected using aliview  
272 (Larsson, 2014).

273

### 274 **Statistical testing**

275 ANOVA, with post hoc Tukey honest significant difference test was performed using R  
276 command Tukey HSD (anova) to test the statistical significance in pathogen load detected in the  
277 inoculated plants via qPCR.

278

## 279 **Results**

280

### 281 ***S. chilense* populations show differences in resistance against *C. fulvum***

282 To confirm that *C. fulvum* is capable of successfully infecting *S. chilense* and to test whether *S.*  
283 *chilense* populations show differences in their resistance spectrum to *C. fulvum*, we spray-  
284 inoculated randomly selected individual plants of *S. chilense* from geographically distinct  
285 populations LA3111 (central) and LA4330 (southern highlands), with a conidial suspension of *C.*  
286 *fulvum* race 5. Upon visual inspection and microscopic evaluation, we found that plants of  
287 population LA3111 show similar phenotypes as our resistant control plant MM-Cf-9, a  
288 recombinant inbred line of *S. lycopersicum* cv. MoneyMaker with introgressed *Cf-9*, thus being  
289 resistant to *C. fulvum* race 5 as this race does produce Avr9. By contrast, LA4330 shows a  
290 phenotype similar to our susceptible control MM-Cf-5, a *Cf-5* introgression line of *S.*  
291 *lycopersicum* of which resistance is circumvented due to a loss of the Avr5 gene by race 5  
292 (Mesarich et al., 2014) (Figure 1a-b).

293 Next we performed quantification of *C. fulvum* DNA load and found significant differences in  
294 pathogen DNA contents between the tested plants ( $p < 0.001$ , ANOVA). Differences can be  
295 seen between the resistant and susceptible control plants ( $p = 0.05$ , TukeyHSD) and LA4330  
296 showed a significantly higher ( $p < 0.001$ , TukeyHSD) presence of *C. fulvum* DNA than LA3111  
297 (Figure 1c). For this we tested five individual plants from each *S. chilense* population and three

298 plants per control. Taken together these findings show that *C. fulvum* is able to infect *S. chilense*  
299 plants and that the various populations behave differently when exposed to *C. fulvum*.

300

### 301 **Southern *S. chilense* populations do not recognize *C. fulvum* effectors**

302 Visible HR upon effector infiltration is an efficient and reliable proxy to test for the resistance  
303 properties of tomato plants on a large scale. To test the geographical variation in *C. fulvum* race 5  
304 resistance, we performed an infiltration assay with apoplastic fluid (AF) of infected susceptible  
305 tomato plants, which is sufficient to trigger an HR in plants carrying matching *Cf* genes. As for  
306 the inoculation a race 5 was used, the AF is anticipated to contain all secreted *C. fulvum*  
307 effectors, except for Avr5. We infiltrated the AF at two sites in the leaves of 155 individuals,  
308 representing 15 different populations (8-17 individuals for each population). Interestingly, we  
309 did not observe any HR-associated recognition of an effector present in the AF by any of the 6  
310 southern populations that we tested, e.g. those belonging to the southern highlands and southern  
311 coastal groups as described by Böndel (2015) and Stam *et al.* (2019b) (Figure 2). Populations  
312 from the northern and central regions do show recognition of at least one of the effectors present  
313 in the AF, as HR development was taking place. Yet, we did not observe this recognition to take  
314 place in all tested plants of the population. Rather, we observed differences in recognition  
315 capacities within the population, with some plants being able to respond with an HR, and some  
316 not. Populations from central regions showed recognition of components present in the AF,  
317 ranging from 10-100% of the plants tested in the different populations (Table S1). Two northern  
318 populations tested showed AF mix recognition for 75% and 80% of the plants tested (Table S1).  
319 All of our infiltration experiments were performed at least three times, in leaves from the same  
320 perennial plants and at the same location.

321

322 **Differential Avr9 and Avr4 recognition patterns are present in *S. chilense***

323 Recognition of Avr9 and Avr4 has been hypothesized to be an important conserved feature in  
324 wild tomato species in order to maintain *C. fulvum* resistance (Kruijt *et al.*, 2005). To understand  
325 the role of the recognition of these Avrs in more detail, we performed additional infiltration  
326 assays, but now with the individual effectors. In order to test whether *S. chilense* plants are able  
327 to specifically recognize Avr9, we infiltrated the plants with a preparation enriched for Avr9.  
328 Populations from the central region showed a very large variation in the ability to recognize  
329 Avr9, with the capacity to recognize Avr9 ranging from 10-80% of the plants that were tested in  
330 individual populations (Table S1). The two northern populations that were tested showed Avr9  
331 recognition for 20% and 37.5% of the plants tested (Figure 3).

332 We also tested the ability of *S. chilense* to recognize Avr4 in a similar fashion, using *Pichia*  
333 *pastoris*-produced Avr4. In the two northern populations we observed that 12.5% and 30% of the  
334 plants showed the capacity to recognize Avr4, whereas in the central populations 0-33% of the  
335 plants showed recognition. Interestingly, contrary to previous reports that *Cf-4* and *Cf-9* are  
336 mutually exclusive, we also found plants that were able to recognize both Avr4 and Avr9 (Figure  
337 2 and Table S1).

338

339 **Presence of canonical *Cf-9*-, *9DC*- and *Cf-4*-specific region in different *S. chilense***  
340 **populations does not correlate with their recognition properties**

341 It has been shown that in *S. pimpinellifolium* either *Cf-9* or *9DC* are responsible for Avr9  
342 recognition (Van der Hoorn *et al.*, 2001). *Cf-9* or *9DC* gene sequences in *S. chilense* have not  
343 been reported to date. Putative full length *Cf-9* or *9DC* genes cannot be found in the currently  
344 available reference genome sequence, possibly due to misassemblies of the complex LRR

345 regions (Stam *et al.*, 2019a). Thus, to investigate which gene is responsible for Avr9 recognition  
346 in *S. chilense* we looked into the presence of *Cf-9* and/or *9DC*, using gene-specific primer  
347 sequences that were used before to identify these genes (Van der Hoorn *et al.*, 2001).

348 We performed *Cf-9* gene-specific PCR amplification on genomic DNA isolated from nine *S.*  
349 *chilense* populations (9 plants per population), using the previously published primers CS5-CS1,  
350 amplifying a 379bp specific region of *Cf-9* (Van der Hoorn *et al.*, 2001). *Cf-9* and *Cf-4*  
351 introgression lines of *S. lycopersicum* served as positive and negative control, respectively. The  
352 *Cf-9*-specific sequence was amplified from all plants, although with different efficiency from all  
353 plants from the phenotyping assay. However, there was no association between presence or  
354 abundance of the amplicon and the response to Avr9 (Figure 4a).

355 In a similar way, we tested the presence of *9DC* using the gene-specific primers DS1-CS1  
356 (product size 507bp). LP12 and MM-Cf-9 served as positive and negative control, respectively.  
357 We found complete absence of the *9DC* canonical region in our populations (Figure 4a).

358 Lastly, we also evaluated the presence of *Cf-4*, using newly designed primers (PSK047-PSK050)  
359 that fall over the intron that defines the difference between *Cf-4* and *Cf-9* (Figure S2) and  
360 amplify a 786bp product that is only present in *Cf-4*. We found that this *Cf-4*-specific region is  
361 present in a few plants belonging to the central population, suggesting that unlike in other  
362 *Solanum*. spp., *Cf-4* and *Cf-9* are not mutually exclusive in *S. chilense* (Figure 4). In addition, the  
363 presence of bands corresponding to the canonical *Cf-4* region in plants non-responsive to Avr4  
364 and the absence in responders, suggests that other or new recombinant gene products with  
365 differences in their function exist in the different populations.

366

367 ***Cf-9* is expressed in a southern population**



368 To test whether failed *Cf-9(-like)* gene expression is responsible for the complete loss of Avr9-  
369 triggered HR in the southern populations; we extracted RNA from 10 individuals from the  
370 LA4330 population. We used a primer pair PSK009-PSK010 that should allow us to amplify  
371 cDNA originating from *Cf-9* orthologs and performed semi quantitative RT-PCR on plants  
372 infiltrated with water and Avr9 (8 hours after infiltration), assuming that Avr9 recognition might  
373 upregulate *Cf-9(-like)* gene expression.

374 Without treatment, we found a transcript expressed in all tested *S. chilense* plants, as well as in  
375 our MM-Cf-9 control plant (Figure S4), indicating that steady state *Cf-9* gene expression is not  
376 affected in the southern *S. chilense* populations.

377 As expected, in the MM-Cf-9 plant we see a stronger band at 8 hours after treatment, indicative  
378 of the upregulation and positive feedback induced by *Cf-9*, a trait that is not visible in the  
379 southern *S. chilense* population (Figure S4).

380

### 381 **Loss of resistance might be due to mutations in *Cf*-coreceptors the southern populations**

382 Seeing that steady state expression levels of *Cf-9* are not affected in the southern populations and  
383 complete loss of resistance is unlikely to result from detrimental mutations on all individual *Cf*  
384 genes. We hypothesize that the general loss of *Cf* responses likely results from changes in *Cf*  
385 regulatory genes, rather than mutations in the individual *Cf* genes themselves. Several core  
386 regulators or co-receptors are known to regulate the Cf protein function.

387 To test this hypothesis, we examined genome sequence data that are available for three plants,  
388 which are from representative populations of the central, southern coastal and southern highlands  
389 region (LA3111, LA2932 and LA4330 respectively) (Stam *et al.*, 2019a). We extracted and  
390 aligned the genomic sequences of the co-receptors *SERK3a* (also known as *BRII-ASSOCIATED*

391 *KINASE 1*, *BAK1*) and *SOBIR1*, the adaptor *ACIK1*, required for regulation of the complex, as  
392 well as another regulatory co-receptor of the *BAK1*-containing complex, *BIR2* and its homolog  
393 *BIR2b* (Table S2). In all cases, the extracted sequence data show polymorphisms between the  
394 reference genome of *S. lycopersicum* Heinz1706 and the Avr4 and Avr9 responsive plant from  
395 LA3111. In-frame indels were found for *BIR2b* between its sequence in *S. lycopersicum* and  
396 those in the three *S. chilense* populations, yet, the three *S. chilense* populations show similar,  
397 complete sequences. Several unique polymorphisms exist in the southern populations, e.g.  
398 occurring in the plants from LA2932 and LA4330, but not in LA3111 from the central region or  
399 in the *S. lycopersicum* reference genome sequence, resulting in up to 19 non-synonymous amino  
400 acid changes for *SERK3a* in the plant from LA4330 (Table 1). In *ACIK1*, both the LA2932 and  
401 the LA4330 plant have unique indels not present in the *S. lycopersicum* reference genome  
402 sequence and in the LA3111 plant (Table 1). These results suggest that there are various possible  
403 amino acid changes these receptors, co-receptors and adaptors that could be responsible for the  
404 observed loss of resistance.

405

## 406 **Discussion**

407 Natural plant populations are hypothesized to maintain a certain durable resistance against  
408 naturally co-occurring pathogens, yet little is known about the dynamics and the underlying  
409 genomic diversity in these populations throughout a species range, which result in the  
410 maintenance or loss of durable resistances.

411 *C. fulvum* is likely a natural pathogen of wild tomato species and known functional *Cf* resistance  
412 genes have been isolated from several wild tomato species. Yet, the physiological interaction  
413 between *C. fulvum* and wild tomato has not been documented. We show that *C. fulvum* race 5 is

414 able to infect *S. chilense*. The formed intercellular hyphae resemble those observed in cultivated  
415 tomato, meaning that also infection in nature will lead to severe reduction in photosynthetic  
416 potential and thus will lead to loss of host fitness. We observed, both by the naked eye, as well as  
417 using microscopy and staining, that after inoculation with *C. fulvum* plants from a *S. chilense*  
418 population from the southern edge of the species range (LA4330) show higher susceptibility  
419 when compared to plants from a population from the central part of the range (LA3111). These  
420 findings were confirmed via quantification of fungal DNA. Thus, we show a compatible  
421 interaction between *C. fulvum* and wild tomato species, but also clear differences in resistance  
422 between the host populations.

423 The interaction between *C. fulvum* and tomato has been proven to be governed by gene-for-gene  
424 interactions, in which secreted Avr's from *C. fulvum* are recognized by corresponding RLP  
425 product of *Cf* gene from tomato (Joosten & de Wit, 1999; Stergiopoulos & de Wit, 2007). We  
426 tested recognition of such Avr's in different populations of *S. chilense* from different  
427 geographical locations with diverse climatic conditions, to understand whether the observed  
428 resistance and susceptibility within *S. chilense* populations to *C. fulvum* follows a specific  
429 geographical pattern. We phenotyped fifteen populations of *S. chilense* covering the whole  
430 species range by infiltrating an apoplastic extract potentially containing all Avr's except for Avr5,  
431 which is able to elicit immune responses that result in an HR. In northern and central  
432 populations, around 70% of the plants recognized at least one Avr present in this extract.  
433 Populations from the southern highlands and the southern coastal genotype groups showed no  
434 Avr recognition. These results point at two important conclusions. First of all, Avr recognition in  
435 the northern and central regions is not as conserved as previously hypothesized and secondly,  
436 Avr recognition appears to have been completely lost at the southern edge of the species range.

437 Previous reports suggest that Avr9 and Avr4 are the main factors in recognition of *C. fulvum* and  
438 this recognition is conserved throughout all wild tomato species (Kruijt *et al.*, 2005). We observe  
439 Avr9 recognition to be present in 29% of the tested plants, whereas 11% of the plants recognized  
440 Avr4. These findings are somewhat contrasting with earlier results. Kruijt *et al.* (2005) tested  
441 only a small number of plants per population and did not report on the actual amounts of  
442 responding plants. In line with our results, they showed Avr4 recognition in 16 out of 20 tested  
443 populations and comparison of the accession numbers and linkage to their geographical origin,  
444 confirmed that only four of the populations tested by Kruijt *et al.* belonged to the southern  
445 genotype groups. Surprisingly, Avr9 recognition was not observed in all 20 accessions of *S.*  
446 *chilense* tested by Kruijt *et al.* (2005), although similar Avr9 have been used. These differences  
447 in results could be explained by the fact that all previous reports used young seedlings to allow  
448 quick screening of the plants. In our assays we use fully mature (over 1-year-old) adult plants,  
449 and we performed repeated infiltrations of the same plants. In addition, we observed differences  
450 in the strength of the HR upon Avr9 infiltration in young and fully developed mature leaves  
451 (Figure S3). Our finding therefore poses the first evidence of Avr9 recognition in *S. chilense* and  
452 suggests that detailed testing of other species under different conditions might yield novel  
453 interesting results. In about 6% of the tested plants we now show dual recognition of both Avr4  
454 and Avr9, which has not been shown earlier.

455 It has been shown that Avr9 can be recognized by two *Cf-9* homologs, referred to as *Cf-9/Hcr9-*  
456 *9C* and the recombinant *9DC*. For both of them, allelic variants with only a few nonsynonymous  
457 mutations are known. We evaluated the presence of known canonical domains that define *Cf-9*  
458 and *9DC* and found that the tested plants in all our populations do have the *Cf-9* domain but are  
459 lacking the *9DC* domain. The sole presence of the *Cf-9* domain is an interesting contrast with the

460 findings of Van der Hoorn *et al.* (2001), who showed the presence of *9DC* to be predominant in  
461 another wild tomato species, *S. pimpinellifolium*, and a complete loss of *Cf-9* in southern  
462 populations of that species. Note that the southernmost *S. pimpinellifolium* populations are  
463 geographically relatively close to the most northerly *S. chilense* populations that were analyzed  
464 in our current study, yet they populate clearly different ecological niches (Peralta *et al.*, 2008).  
465 Likewise, we also evaluated the presence of the *Cf-4* canonical region in our populations. The  
466 canonical *Cf-4* domain is present in some individuals, but this does not correlate with our  
467 phenotypic data on the development of an HR upon infiltration with the Avr4 protein. There can  
468 be various reasons for this observation. First, the annealing sites of the *Cf-4* primers used might  
469 carry crucial SNPs in *S. chilense*, resulting in failure of the PCR no detectable bands. Second, the  
470 targeted region might be missing in the gene coding for the Avr4-responsive Cf protein, which  
471 would not be surprising as similar mechanisms of recombination events, resulting in the  
472 generation of a new gene of which the encoded protein has retained its recognition specificity,  
473 have been reported earlier for other *Hcr9s*, albeit on a phylogenetic rather than population scale  
474 (Van der Hoorn *et al.*, 2001). Moreover, a study on *Cf-2* identified 26 different homologs in *S.*  
475 *pimpinellifolium* populations and revealed possible presence/absence variation of *Cf-2* among  
476 individuals (Caicedo & Schaal, 2004). Presence of canonical regions of *Cf-4* in the individual  
477 with *Cf-9* canonical region confirms the dual presence of previous though allelic gene which can  
478 be possibly due to heterozygosity at the locus.

479 Recombination and gene conversion have been shown to play a major role in gene family  
480 evolution for RLP family as well as other resistance gene families (Paniske *et al.*, 1997;  
481 Mondragon-Palomino & Gaut, 2005; Mondragon-Palomino *et al.*, 2017). Recently, it has been  
482 reported that such gene conversions, or micro recombinations, of NLR genes can also be

483 observed between accessions of another wild *Solanum* sp., leading to an alternative mechanism  
484 to maintain different functional alleles (Witek *et al.*, 2020). We conclude that also the *Cf* gene  
485 family is likely not conserved *sensu stricto*, and hypothesize that a large number of possibly  
486 functional alleles are formed and maintained through intragenic micro recombinations, not just  
487 on a phylogenetic scale, but also between or even within populations of the same species.

488 The loss of Avr recognition in southern populations could be explained by the possibility that  
489 these plants recognize different Avrs which are absent in *C. fulvum* race 5. Yet, our findings  
490 show that northern and central populations of *S. chilense* do possess resistance against *C. fulvum*  
491 race 5. Our apoplastic extract contains at least 70 secreted effectors, which are all potential Avrs  
492 (Mesarich *et al.*, 2017). The chance of losing recognition for all of these effectors by mutations  
493 in the matching receptors is highly unlikely, thus hinting at general differences in the regulation  
494 of Avr recognition. Semi quantitative RT PCR experiments showed that *Cf-9*-like genes appear  
495 to be expressed in both Avr9-recognizing and non-recognizing plants. Single point mutations in  
496 genes encoding essential co-receptors, like SOBIR1 or BAK1 have been shown to lead to loss in  
497 ability to induce HR when expressed in a heterologous system (Bi *et al.*, 2016) or *Arabidopsis*  
498 *thaliana* (Albert *et al.*, 2019). Thus accumulation of deleterious mutations in such coreceptors or  
499 contrarily, accumulation of beneficial mutations related to, for example drought adaptation, that  
500 generate a trade of in resistance, are possible. BAK1/SERK3a is a co-regulator, in not only  
501 defense responses, but the receptor-like kinase also plays a role in general cell regulatory  
502 processes and is drought-responsive (Schwessinger *et al.*, 2011). Genomic data for non-  
503 responding plants from the southern populations revealed several nonsynonymous mutations, as  
504 well as indels in multiple RLP/*Cf* co-receptor-encoding genes, when comparing them to either  
505 the sequence from the LA3111 reference plant, or the *S. lycopersicum* reference Heinz 1706,

506 thus suggesting that changes in downstream regulation mechanisms could have caused the loss  
507 of Avr recognition in the south. Follow-up studies should determine which of the many altered  
508 genes are causal. Since the co-receptors have multiple functions apart from Cf protein signaling,  
509 such experiments might simultaneously shed light on how the different components of the  
510 signaling network interact.

511 Loss of resistance over time at the population level is rather poorly understood, with some  
512 theories possibly explaining this mechanism (Koskella, 2018). For instance, evolutionary loss of  
513 resistance in certain populations might happen as a result of genetic drift, e.g. after a severe  
514 bottle neck. However, if these populations would encounter any pathogen pressure afterwards,  
515 this would be detrimental. Loss of resistance can be the outcome of random processes that are  
516 triggered to take place due to loss of selection pressure, but this loss can also be the result of  
517 accelerated evolution due to the, much debated, assumed fitness costs of carrying obsolete  
518 resistance genes (Tian *et al.*, 2003; Sheldon & Verhulst, 1996). The role of distribution of *C.*  
519 *fulvum* in shaping the evolutionary distribution of *Cf-2* homologs has been proposed by Caicedo  
520 (2008).

521 Giraud *et al.* (2017) point out that parasites need to develop a local adaptation to their  
522 environment beyond their host. Loss of resistance, as observed in our system, strongly suggests  
523 that a mechanism of ecological feedback is taking place, where the ecology of the population  
524 becomes a driving force to lose resistance or to maintain it. Therefore, the absence of the *C.*  
525 *fulvum* pathogen in the southern locations, due to extremely dry climatic conditions, which are  
526 not suitable for infection by *C. fulvum*, would be a plausible explanation. Interestingly, higher  
527 susceptibility to other pathogens also requiring relatively high humidity for successful infection,  
528 like *Phytophthora infestans* and *Alternaria* sp., was already described for southern populations of

529 *S. chilense* (Stam *et al.*, 2017). Seeing that some co-receptors potentially play a role in abiotic  
530 stress responses, a third possibility would be that the loss of resistance comes as a tradeoff for  
531 environmental adaptation. Yet, this is likely still intrinsically coupled to a decreased pathogen  
532 pressure.

533 In conclusion, we show that *Hcr9* locus in *S. chilense* is much more complex than was thought  
534 before (Parniske *et al.*, 1997; Van der Hoorn *et al.*, 2001; Kruijt *et al.*, 2004; 2005). This might  
535 in part be due to the stronger niche differentiation, or the larger heterozygosity of *S. chilense*  
536 specifically (Moyle, 2008). However, it is also likely that there is a lot of undiscovered diversity  
537 in the *Cf* gene family present in other *Solanum* species. Furthermore, we provide an example of  
538 the loss of resistance in a wild tomato species at the edge of its geographical distribution,  
539 possibly explained by changes in the underlying immune receptor complexes.

540 Overall this study provides a step forward in terms of placing major gene-mediated molecular  
541 defense mechanisms in an ecological context.

542

### 543 **Acknowledgements**

544 We like to thank Liza Keitel and Lina Muñoz for help with the experiments, Sabine Zuber,  
545 Bärbel Breulmann and Anneliese Keil for maintaining the *S. chilense* populations and members  
546 of SBF924 for fruitful discussions and useful feedback.

547

### 548 **Conflicts of interests**

549 The authors declare that no competing interests exist

550

### 551 **References:**



- 552 Albert, I., Zhang, L., Bemm, H., & Nürnberger, T. (2019). Structure-function analysis of  
553 immune receptor AtRLP23 with its ligand nlp20 and coreceptors AtSOBIR1 and AtBAK1.  
554 *Molecular Plant-Microbe Interactions*, 32(8), 1038–1046. doi:10.1094/MPMI-09-18-0263-R
- 555 Bi, G., Liebrand, T. W. H., Bye, R. R., Postma, J., van der Burgh, A. M., Robatzek, S., ...  
556 Joosten, M. H. A. J. (2016). SOBIR1 requires the GxxxG dimerization motif in its  
557 transmembrane domain to form constitutive complexes with receptor-like proteins: Functional  
558 analysis of SOBIR1. *Molecular Plant Pathology*, 17(1), 96–107. doi:10.1111/mpp.12266
- 559 Böndel, K. B., Lainer, H., Nosenko, T., Mboup, M., Tellier, A., & Stephan, W. (2015). North–  
560 south colonization associated with local adaptation of the wild tomato species *Solanum*  
561 *chilense*. *Molecular Biology and Evolution*, 32(11), 2932–2943. doi:10.1093/molbev/msv166
- 562 Caicedo, A. L. (2008). Geographic diversity cline of R gene homologs in wild populations of  
563 *Solanum pimpinellifolium* (Solanaceae). *American Journal of Botany*, 95(3), 393–398.  
564 doi:10.3732/ajb.95.3.393
- 565 Caicedo, A. L., & Schaal, B. A. (2004). Heterogeneous evolutionary processes affect R gene  
566 diversity in natural populations of *Solanum pimpinellifolium*. *Proceedings of the National*  
567 *Academy of Sciences*, 101(50), 17444–17449. doi:10.1073/pnas.0407899101
- 568 Cereceda, P., & Schemenauer, R. S. (1991). The occurrence of fog in Chile. *Journal of Applied*  
569 *Meteorology*, 30(8), 1097–1105. doi:10.1175/1520-0450(1991)030<1097:TOOFIC>2.0.CO;2
- 570 Chetelat, R. T., Pertuzé, R. A., Faúndez, L., Graham, E. B., & Jones, C. M. (2009). Distribution,  
571 ecology and reproductive biology of wild tomatoes and related nightshades from the Atacama  
572 Desert region of northern Chile. *Euphytica*, 167(1), 77–93. doi:10.1007/s10681-008-9863-6
- 573 Fischer, I., Steige, K. A., Stephan, W., & Mboup, M. (2013). Sequence evolution and expression  
574 regulation of stress-responsive genes in natural populations of wild tomato. *PLOS ONE*, 8(10),  
575 e78182. doi:10.1371/journal.pone.0078182
- 576 Flor, H. H. (1971). Current status of the gene-for-gene concept. *Annual Review of*  
577 *Phytopathology*. doi:10.1146/annurev.py.09.090171.001423
- 578 Giraud, T., Koskella, B., & Laine, A.-L. (2017). Introduction: microbial local adaptation:  
579 insights from natural populations, genomics and experimental evolution. *Molecular Ecology*,  
580 26(7), 1703–1710. doi:10.1111/mec.14091
- 581 Halter, T., Imkampe, J., Mazzotta, S., Wierzba, M., Postel, S., Bücherl, C., ... Kemmerling, B.  
582 (2014). The leucine-rich repeat receptor kinase BIR2 is a negative regulator of BAK1 in plant  
583 immunity. *Current Biology*, 24(2), 134–143. doi:10.1016/j.cub.2013.11.047
- 584 Hoorn, R. A. L. V. der, Kruijt, M., Roth, R., Brandwagt, B. F., Joosten, M. H. A. J., & Wit, P. J.  
585 G. M. D. (2001). Intragenic recombination generated two distinct *Cf* genes that mediate Avr9  
586 recognition in the natural population of *Lycopersicon pimpinellifolium*. *Proceedings of the*  
587 *National Academy of Sciences*, 98(18), 10493–10498. doi:10.1073/pnas.181241798
- 588 Iida, Y., van 't Hof, P., Beenen, H., Mesarich, C., Kubota, M., Stergiopoulos, I., ... de Wit, P. J.  
589 G. M. (2015). Novel mutations detected in avirulence genes overcoming tomato *Cf* resistance  
590 genes in isolates of a Japanese population of *Cladosporium fulvum*. *PLOS ONE*, 10(4),  
591 e0123271. doi:10.1371/journal.pone.0123271
- 592 Jones, D., Thomas, C., Hammond-Kosack, K., Balint-Kurti, P., & Jones, J. (1994). Isolation of  
593 the tomato *Cf-9* gene for resistance to *Cladosporium fulvum* by transposon tagging. *Science*,  
594 266(5186), 789–793. doi:10.1126/science.7973631
- 595 Joosten, M., & de Wit, P. (1999). The tomato *Cladosporium fulvum* interaction: A versatile  
596 experimental system to study plant-pathogen interactions. *Annual Review of Phytopathology*,  
597 37(1), 335–367. doi:10.1146/annurev.phyto.37.1.335

- 598 Joosten, M. H. A. J., Cozijnsen, T. J., & De Wit, P. J. G. M. (1994). Host resistance to a fungal  
599 tomato pathogen lost by a single base-pair change in an avirulence gene. *Nature*, *367*(6461),  
600 384–386. doi:10.1038/367384a0
- 601 Kanwar, J. S., Kerr, E. A., & Harney, P. M. (1980). Linkage of the *Cf-12* to *Cf-24* genes for  
602 resistance to tomato leaf mold *Cladosporium fulvum* Cke. *Rep Tomato Genet Coop*, *30*, 22–3.
- 603 Koskella, B. (2018). Resistance gained, resistance lost: An explanation for host–parasite  
604 coexistence. *PLOS Biology*, *16*(9), e3000013. doi:10.1371/journal.pbio.3000013
- 605 Kruijt, M., Kip, D. J., Joosten, M. H. A. J., Brandwagt, B. F., & de Wit, P. J. G. M. (2005). The  
606 *Cf-4* and *Cf-9* resistance genes against *Cladosporium fulvum* are conserved in wild tomato  
607 species. *Molecular Plant-Microbe Interactions*®, *18*(9), 1011–1021. doi:10.1094/MPMI-18-  
608 1011
- 609 Laine, A.-L. (2005). Spatial scale of local adaptation in a plant-pathogen metapopulation.  
610 *Journal of Evolutionary Biology*, *18*(4), 930–938. doi:10.1111/j.1420-9101.2005.00933.x
- 611 Larsson, A. (2014). AliView: a fast and lightweight alignment viewer and editor for large  
612 datasets. *Bioinformatics*, *30*(22), 3276–3278. doi:10.1093/bioinformatics/btu531
- 613 Lazarovits, G., & Higgins, V. J. (1976). Histological comparison of *Cladosporium fulvum* race 1  
614 on immune, resistant, and susceptible tomato varieties. *Canadian Journal of Botany*, *54*(3–4),  
615 224–234. doi:10.1139/b76-022
- 616 Li, H. (2011). A statistical framework for SNP calling, mutation discovery, association mapping  
617 and population genetical parameter estimation from sequencing data. *Bioinformatics*, *27*(21),  
618 2987–2993. doi:10.1093/bioinformatics/btr509
- 619 Li, H., Handsaker, B., Wysoker, A., Fennell, T., Ruan, J., Homer, N., ... 1000 Genome project  
620 data processing subgroup. (2009). The sequence alignment/map format and SAMtools.  
621 *Bioinformatics*, *25*(16), 2078–2079. doi:10.1093/bioinformatics/btp352
- 622 Mesarich, C. H., Kmen, B., Rovenich, H., Griffiths, S. A., Wang, C., Karimi Jashni, M., ... de  
623 Wit, P. J. G. M. (2017). Specific hypersensitive response–associated recognition of new  
624 apoplastic effectors from *Cladosporium fulvum* in wild tomato. *Molecular Plant-Microbe*  
625 *Interactions*®, *31*(1), 145–162. doi:10.1094/MPMI-05-17-0114-FI
- 626 Mondragon-Palomino, M., & Gaut, B. S. (2005). Gene conversion and the evolution of three  
627 leucine-rich repeat gene families in *Arabidopsis thaliana*. *Molecular Biology and Evolution*,  
628 *22*(12), 2444–2456. doi:10.1093/molbev/msi241
- 629 Mondragón-Palomino, M., Stam, R., John-Arputharaj, A., & Dresselhaus, T. (2017).  
630 Diversification of defensins and NLRs in *Arabidopsis* species by different evolutionary  
631 mechanisms. *BMC Evolutionary Biology*, *17*(1), 255. doi:10.1186/s12862-017-1099-4
- 632 Nakazato, T., Warren, D. L., & Moyle, L. C. (2010). Ecological and geographic modes of  
633 species divergence in wild tomatoes. *American Journal of Botany*, *97*(4), 680–693.  
634 doi:10.3732/ajb.0900216
- 635 Nosenko, T., Böndel, K. B., Kumpfmüller, G., & Stephan, W. (2016). Adaptation to low  
636 temperatures in the wild tomato species *Solanum chilense*. *Molecular Ecology*, *25*(12), 2853–  
637 2869. doi:10.1111/mec.13637
- 638 Parniske, M., Hammond-Kosack, K. E., Golstein, C., Thomas, C. M., Jones, D. A., Harrison, K.,  
639 ... Jones, J. D. G. (1997). Novel disease resistance specificities result from sequence exchange  
640 between tandemly repeated genes at the *Cf-4/9* locus of tomato. *Cell*, *91*(6), 821–832.  
641 doi:10.1016/S0092-8674(00)80470-5
- 642 Peralta, I. E., Spooner, D. M., & Knapp, S. (2008). Taxonomy of wild tomatoes and their  
643 relatives (*Solanum* sect. *Lycopersicoides*, sect. *Juglandifolia*, sect. *Lycopersicon*; *Solanaceae*).

- 644 American Society of Plant Taxonomists. Retrieved from [https://agris.fao.org/agris-](https://agris.fao.org/agris-search/search.do?recordID=US201300127979)  
645 [search/search.do?recordID=US201300127979](https://agris.fao.org/agris-search/search.do?recordID=US201300127979)
- 646 Pertea, G., & Pertea, M. (2020). GFF Utilities: GffRead and GffCompare. *F1000Research*, 9,  
647 304. doi:10.12688/f1000research.23297.1
- 648 Petit, E., Silver, C., Cornille, A., Gladieux, P., Rosenthal, L., Bruns, E., ... Hood, M. E. (2017).  
649 Co-occurrence and hybridization of anther-smut pathogens specialized on *Dianthus* hosts.  
650 *Molecular Ecology*, 26(7), 1877–1890. doi:10.1111/mec.14073
- 651 Salvaudon, L., Giraud, T., & Shykoff, J. A. (2008). Genetic diversity in natural populations: a  
652 fundamental component of plant–microbe interactions. *Current Opinion in Plant Biology*,  
653 11(2), 135–143. doi:10.1016/j.pbi.2008.02.002
- 654 Schottens-Toma, I. M. J., & de Wit, P. J. G. M. (1988). Purification and primary structure of a  
655 necrosis-inducing peptide from the apoplastic fluids of tomato infected with *Cladosporium*  
656 *fulvum* (syn. *Fulvia fulva*). *Physiological and Molecular Plant Pathology*, 33(1), 59–67.  
657 doi:10.1016/0885-5765(88)90043-4
- 658 Schwessinger, B., Roux, M., Kadota, Y., Ntoukakis, V., Sklenar, J., Jones, A., & Zipfel, C.  
659 (2011). Phosphorylation-dependent differential regulation of plant growth, cell death, and  
660 innate immunity by the regulatory receptor-like kinase BAK1. *PLOS Genetics*, 7(4), e1002046.  
661 doi:10.1371/journal.pgen.1002046
- 662 Sheldon, B. C., & Verhulst, S. (1996). Ecological immunology: costly parasite defences and  
663 trade-offs in evolutionary ecology. *Trends in Ecology & Evolution*, 11(8), 317–321.  
664 doi:10.1016/0169-5347(96)10039-2
- 665 Sheldon, B. C., & Verhulst, S. (1996). Ecological immunology: costly parasite defences and  
666 trade-offs in evolutionary ecology. *Trends in Ecology & Evolution*, 11(8), 317–321.  
667 doi:10.1016/0169-5347(96)10039-2
- 668 Soubeyrand, S., Laine, A. -L., Hanski, I., & Penttinen, A. (2009). Spatiotemporal structure of  
669 host-pathogen interactions in a metapopulation. *The American Naturalist*, 174(3), 308–320.  
670 doi:10.1086/603624
- 671 Stam, R., Nosenko, T., Hörger, A. C., Stephan, W., Seidel, M., Kuhn, J. M. M., ... Tellier, A.  
672 (2019). The *de novo* reference genome and transcriptome assemblies of the wild tomato species  
673 *Solanum chilense* highlights birth and death of *NLR* genes between tomato species. *G3: Genes*,  
674 *Genomes, Genetics*, 9(12), 3933–3941. doi:10.1534/g3.119.400529
- 675 Stam, R., Scheikl, D., & Tellier, A. (2016). Pooled enrichment sequencing identifies diversity  
676 and evolutionary pressures at *NLR* resistance genes within a wild tomato population. *Genome*  
677 *Biology and Evolution*, 8(5), 1501–1515. doi:10.1093/gbe/evw094
- 678 Stam, R., Scheikl, D., & Tellier, A. (2017). The wild tomato species *Solanum chilense* shows  
679 variation in pathogen resistance between geographically distinct populations. *PeerJ*, 5, e2910.  
680 doi:10.7717/peerj.2910
- 681 Stam, R., Silva-Arias, G. A., & Tellier, A. (2019). Subsets of *NLR* genes show differential  
682 signatures of adaptation during colonization of new habitats. *New Phytologist*, 224(1), 367–  
683 379. doi:10.1111/nph.16017
- 684 Stergiopoulos, I., & de Wit, P. J. G. M. (2009). Fungal effector proteins. *Annual Review of*  
685 *Phytopathology*, 47(1), 233–263. doi:10.1146/annurev.phyto.112408.132637
- 686 Thomas, C. M., Jones, D. A., Parniske, M., Harrison, K., Balint-Kurti, P. J., Hatzixanthis, K., &  
687 Jones, J. D. (1997). Characterization of the tomato *Cf-4* gene for resistance to *Cladosporium*  
688 *fulvum* identifies sequences that determine recognitional specificity in *Cf-4* and *Cf-9*. *The Plant*  
689 *Cell*, 9(12), 2209–2224. doi:10.1105/tpc.9.12.2209

- 690 Thrall, P. H. (2003). Evolution of virulence in a plant host-pathogen metapopulation. *Science*,  
691 299(5613), 1735–1737. doi:10.1126/science.1080070
- 692 Thrall, Peter H., Burdon, J. J., & Bever, J. D. (2002). Local adaptation in the *Linum marginale*-  
693 *Melampsora lini* host-pathogen interaction. *Evolution; International Journal of Organic*  
694 *Evolution*, 56(7), 1340–1351. doi:10.1111/j.0014-3820.2002.tb01448.x
- 695 Tian, D., Traw, M. B., Chen, J. Q., Kreitman, M., & Bergelson, J. (2003). Fitness costs of R-  
696 gene-mediated resistance in *Arabidopsis thaliana*. *Nature*, 423(6935), 74–77.  
697 doi:10.1038/nature01588
- 698 Tigchelaar, E. C. (1984). Collections of isogenic tomato stocks. *Rep Tomato Genet Coop*, 34,  
699 55–57.
- 700 van den Burg, H. A., Spronk, C. A. E. M., Boeren, S., Kennedy, M. A., Vissers, J. P. C., Vuister,  
701 G. W., ... Vervoort, J. (2004). Binding of the Avr4 Elicitor of *Cladosporium fulvum* to  
702 chitotriose units is facilitated by positive allosteric protein-protein interactions: the chitin-  
703 binding site of Avr4 represents a novel binding site on the folding scaffold shared between the  
704 invertebrate and the plant chitin-binding domain. *Journal of Biological Chemistry*, 279(16),  
705 16786–16796. doi:10.1074/jbc.M312594200
- 706 Van Valen, L. (1973). A new evolutionary law. *evolutionary theory*, 1, 1–30. Retrieved from  
707 [https://ebme.marine.rutgers.edu/HistoryEarthSystems/HistEarthSystems\\_Fall2010/VanValen%](https://ebme.marine.rutgers.edu/HistoryEarthSystems/HistEarthSystems_Fall2010/VanValen%201973%20Evol%20%20Theor%20.pdf)  
708 [201973%20Evol%20%20Theor%20.pdf](https://ebme.marine.rutgers.edu/HistoryEarthSystems/HistEarthSystems_Fall2010/VanValen%201973%20Evol%20%20Theor%20.pdf)
- 709 Wit, P. J. G. M. de, Burgt, A. van der, Ökmen, B., Stergiopoulos, I., Abd-Elsalam, K. A., Aerts,  
710 A. L., ... Bradshaw, R. E. (2012). The genomes of the fungal plant pathogens *Cladosporium*  
711 *fulvum* and *Dothistroma septosporum* reveal adaptation to different hosts and lifestyles but also  
712 signatures of common ancestry. *PLOS Genetics*, 8(11), e1003088.  
713 doi:10.1371/journal.pgen.1003088
- 714 Witek, K., Lin, X., Karki, H. S., Jupe, F., Witek, A. I., Steuernagel, B., ... Jones, J. D. (2020). A  
715 complex resistance locus in *Solanum americanum* recognizes a conserved *Phytophthora*  
716 effector. *BioRxiv*, 2020.05.15.095497. doi:10.1101/2020.05.15.095497
- 717 Wu, J. (2020). Regulation and activation of SOBIR1-containing receptor complexes involved in  
718 plant immune signalling. Wageningen University. doi:/10.18174/504639
- 719 Yan, L., Zhang, C., Ding, L., & Ma, Z. (2008). Development of a real-time PCR assay for the  
720 detection of *Cladosporium fulvum* in tomato leaves. *Journal of Applied Microbiology*, 104(5),  
721 1417–1424. doi:10.1111/j.1365-2672.2007.03660.x
- 722

## 723 **Author contributions**

724 Conceptualization: RS, RH, PSK and MJ; Investigation: PSK, MSS, GZ and DS; Contribution of  
725 materials: MJ; Funding acquisition: RS; Writing: PSK and RS. All authors reviewed and  
726 approved the manuscript.

## 1 Table

2 Table 1: Number of non-synonymous SNPs or indels observed in the open reading frame of genes  
3 encoding co-receptors or adaptors of *Cf* genes in the two southern populations LA2932 and LA4330.

| Gene Name     | SNPs in<br>LA2932 | SNPs in<br>LA4330 | SNPs in both<br>LA2932 and LA4330 |
|---------------|-------------------|-------------------|-----------------------------------|
| <i>SOBIR1</i> | 4                 | 1                 | 0                                 |
| <i>SERK3a</i> | 4                 | 19                | 1                                 |
| <i>ACIK1</i>  | 1                 | 3                 | 2                                 |
| <i>BIR2</i>   | 2                 | 3                 | 0                                 |
| <i>BIR2b</i>  | 2                 | 1                 | 1                                 |

4

## 5 Figures

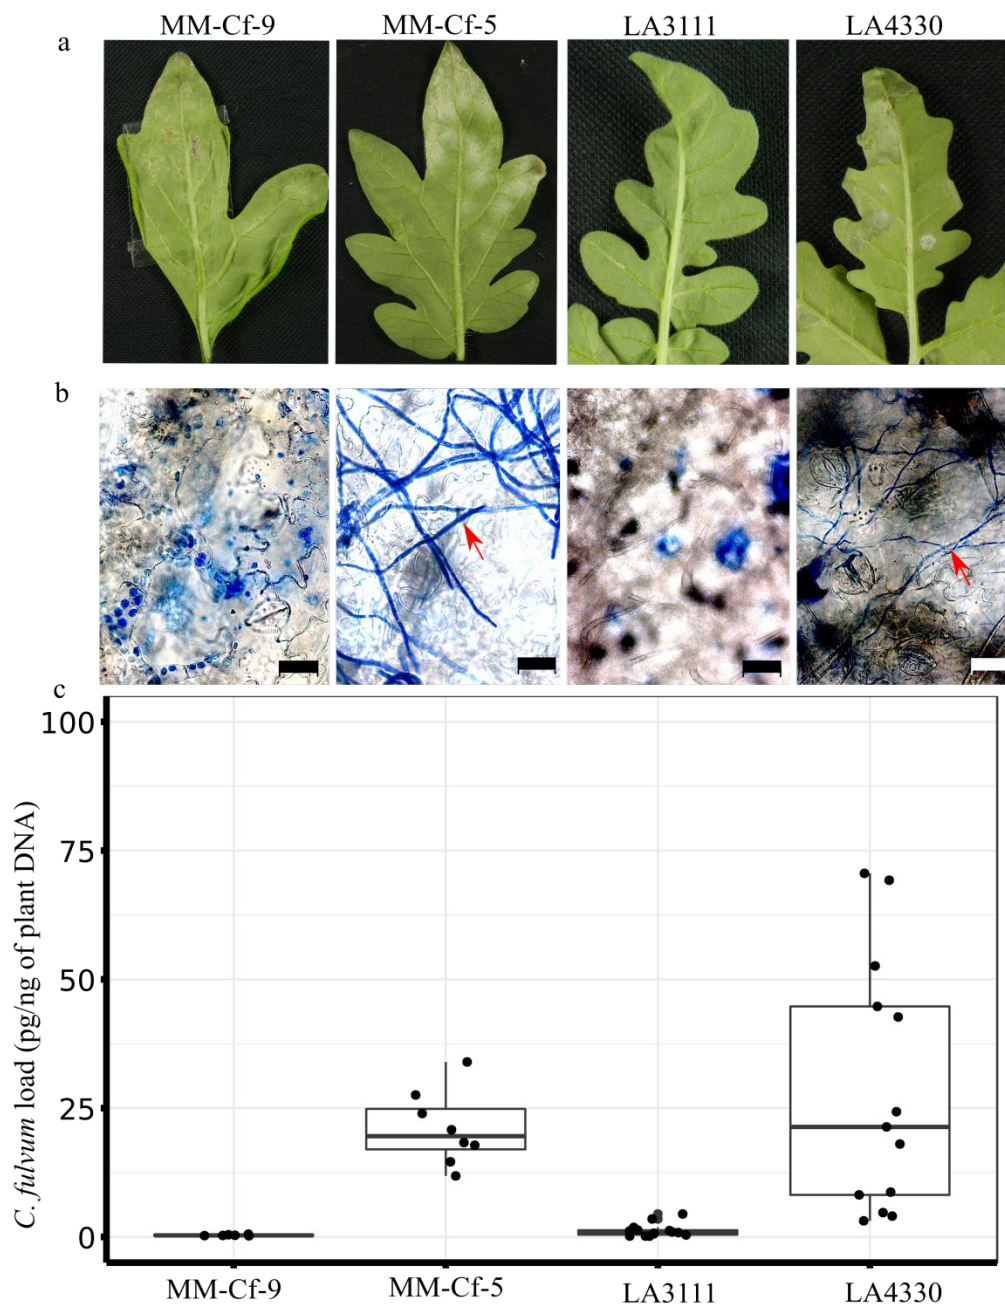

6

7Figure 1: Tomato leaves inoculated with  $2 \times 10^4$  conidia/ml. a) Left to right: inoculated leaves harvested  
8at 14 dpi of MM-Cf-9, MM-Cf-5 and *S. chilense* population LA3111 and LA4330. b) Microscopic  
9pictures of bleached leaves (scale bar =  $20 \mu\text{m}$ ), after staining with ink (mycelium of pathogen indicated  
10with red arrows). c) Quantification of *C. fulvum* DNA load in pg/ng of plant DNA after 14 dpi of  
11inoculation in 3 plants per MM control and 5 plants per *S. chilense* population. All the plants were  
12evaluated in three technical replicates and each data point shows pathogen load per technical replicate.

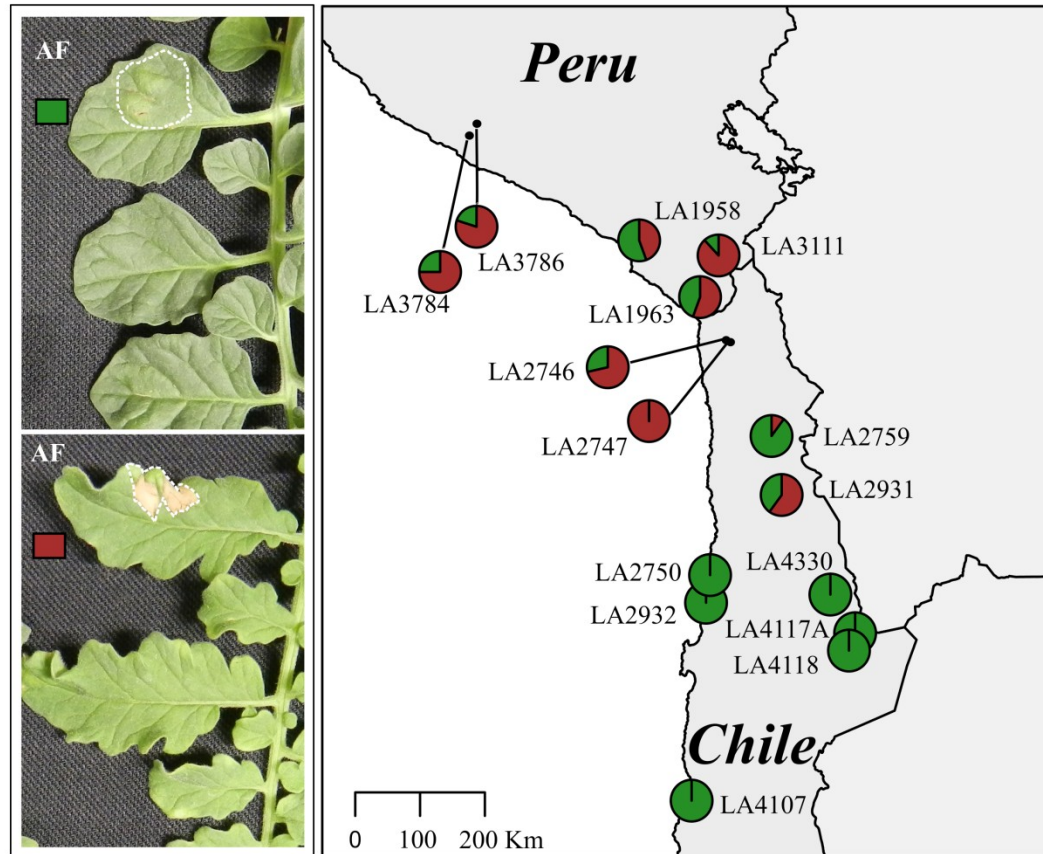

13

14 Figure 2: Infiltration of AF in populations of *S. chilense*. Leaf of an individual plant with no recognition  
15 of components present in the infiltrated AF (top left) and leaf of an individual plant recognizing at least  
16 one component present in the AF (bottom left). The infiltrated areas are indicated with white dotted lines.  
17 The map on the right shows the geographical distribution of AF component perception in *S. chilense*. The  
18 map shows the geographically distinct populations of *S. chilense* and their response to infiltration with AF  
19 Each pie chart indicates one population with 8 to 17 individuals. The brick red fraction represents plants  
20 that respond to *C. fulvum* AF, whereas green indicates the fraction of non-responding plants.

21

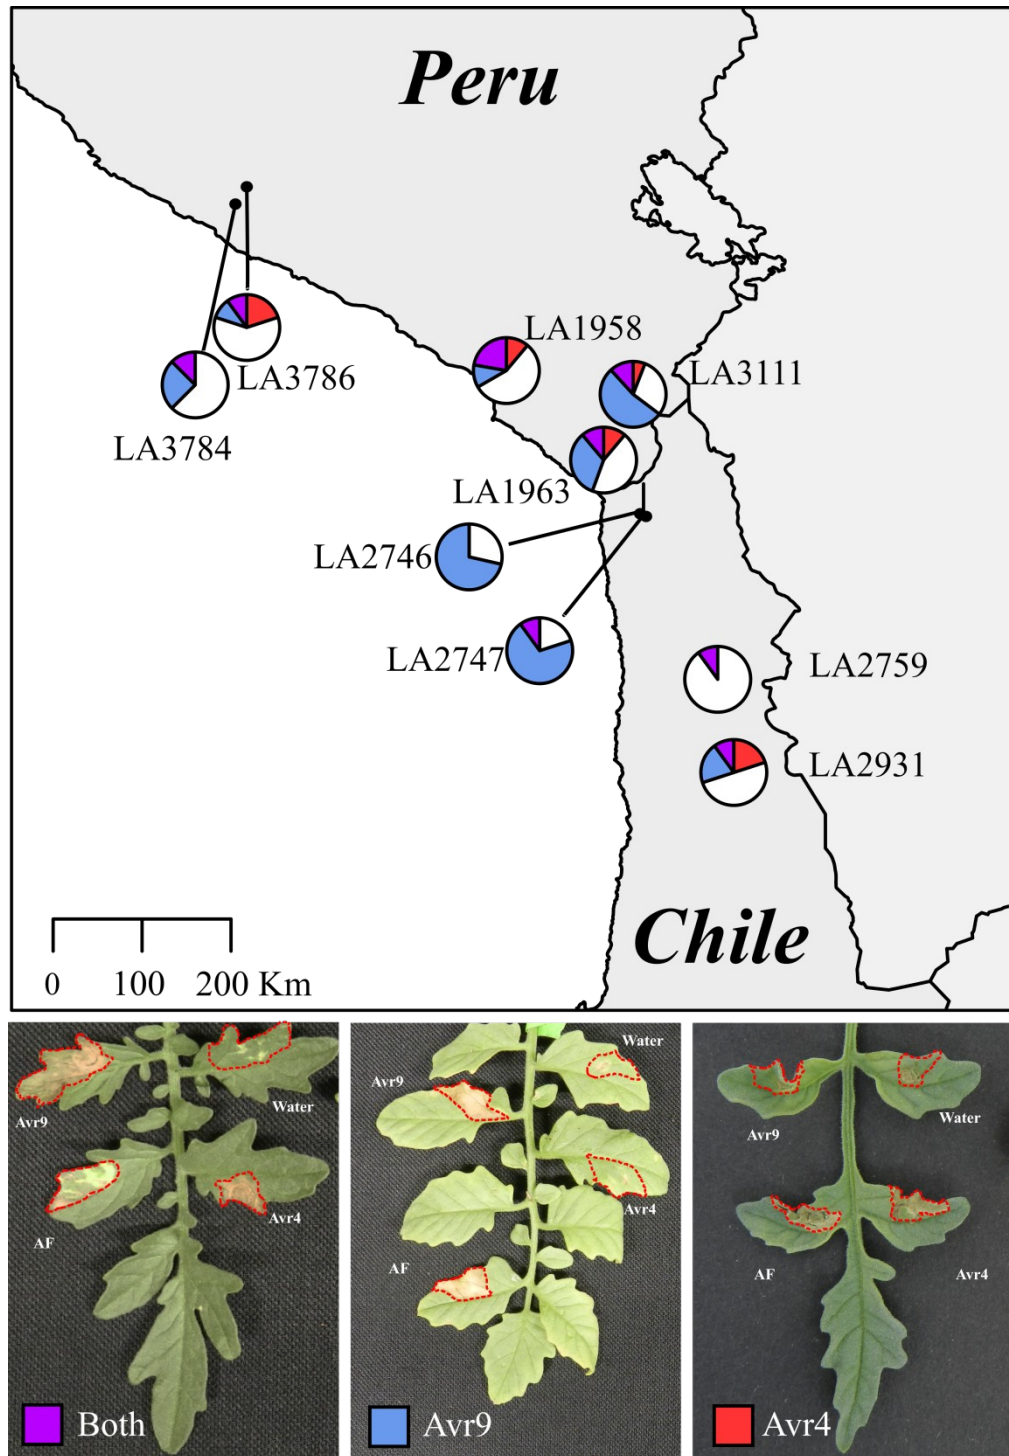

22

23Figure 3: Geographical distribution of Avr9 and Avr4 perception in *S. chilense*. The map shows  
24populations of *S. chilense* and their response to infiltration with Avr9 and Avr4 (purple when there is an  
25HR-associated response to both), Avr9 (blue when there is an HR-associated response) and Avr4 (red  
26when there is an HR-associated response). White sectors indicate plants showing no recognition of either  
27Avr9 or Avr4. The infiltrated areas are indicated with red dotted lines. Each pie chart indicates one  
28population with 8 to 17 individuals.



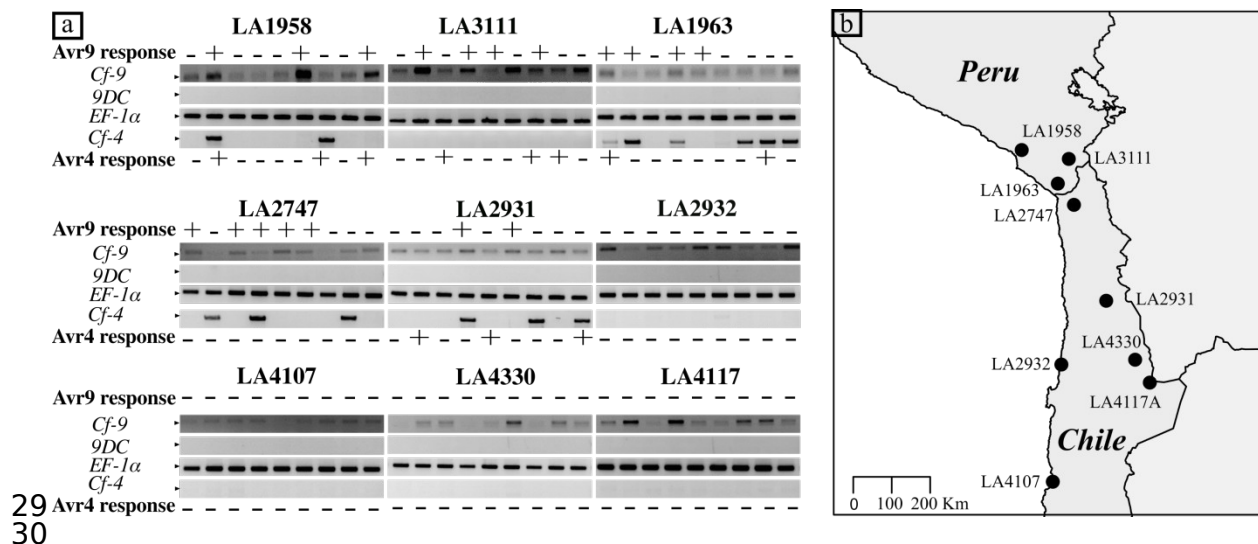

31 Figure 4: Amplification of the canonical *Cf-9*, *9DC* and *Cf-4* region in geographically distinct populations  
 32 of *S. chilense*. a) The CS5/CS1 primer pair was used to amplify a fragment of *Cf-9* (378 bp), the DS1/CS1  
 33 primer pair for *9DC* (507bp) and the PSK047/PSK050 primer pair for *Cf-4* (728bp). As a PCR control  
 34 part of the coding region of *elongation factor 1 alpha* (*EF-1α*) was amplified using the primer pair  
 35 RS003/RS004 (400 bp). MM-*Cf-9* and MM-*CF-4*, and LP12 (*9DC*) were used as controls (Figure S2). +  
 36 or – are indicative of Avr9 and Avr4 responsiveness upon infiltration of these effectors (Figure 2). b) Map  
 37 shows the populations used in the analysis.
